# Supplementary material for: DNAJB1-PRKACA in HEK293T cells induces LINC00473 overexpression that depends on PKA signaling
Source: PubMed Central journal article supplement (PMC8846505; doi:10.1371/journal.pone.0263829), 2022-02-15
Supplement: pone.0263829.s002.pdf [file pone.0263829.s002.pdf]

Supplementary Figure S2.

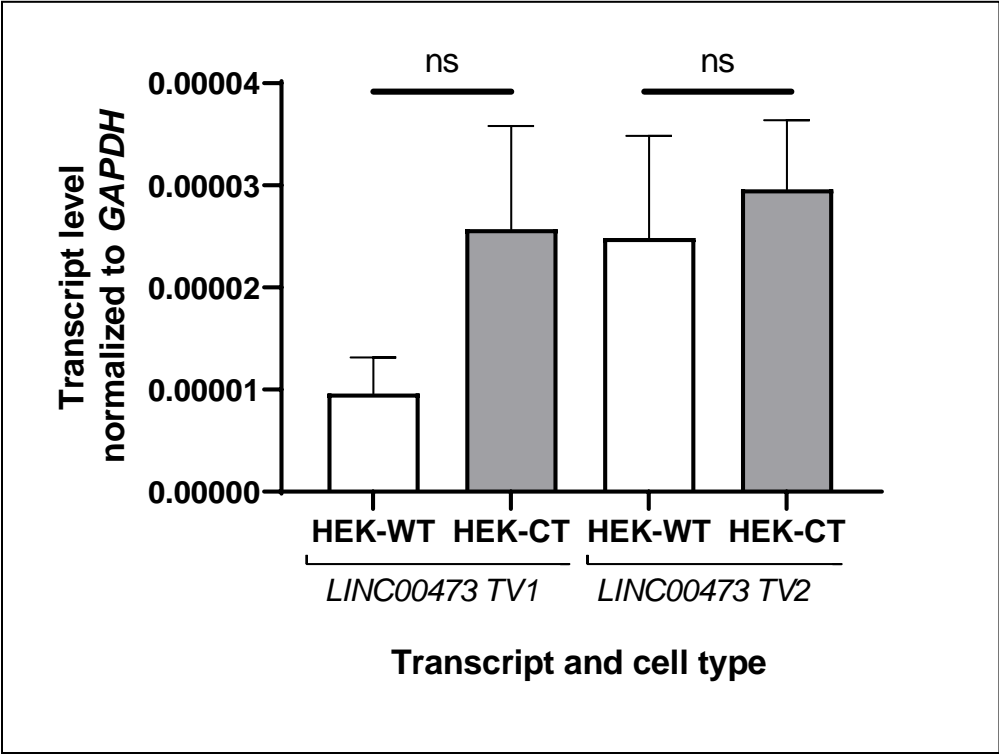

**Supplementary Figure S2. *LINC00473* expression is unchanged in HEK-CT cells compared to HEK-WT cells.** Five HEK-CT clones which were established after transfection with vectors lacking guide RNA sequences have the same level of *LINC00473* expression compared to HEK-WT cells.
