# Supplementary material for: DNAJB1-PRKACA in HEK293T cells induces LINC00473 overexpression that depends on PKA signaling
Source: PubMed Central journal article supplement (PMC8846505; doi:10.1371/journal.pone.0263829), 2022-02-15
Supplement: pone.0263829.s003.pdf [file pone.0263829.s003.pdf]

Supplementary Figure S3.

(a)

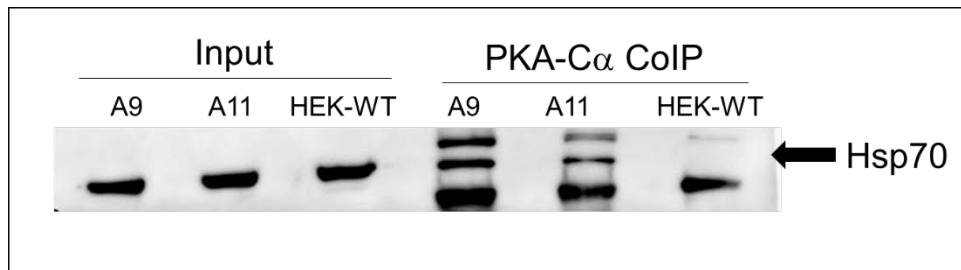

(b)

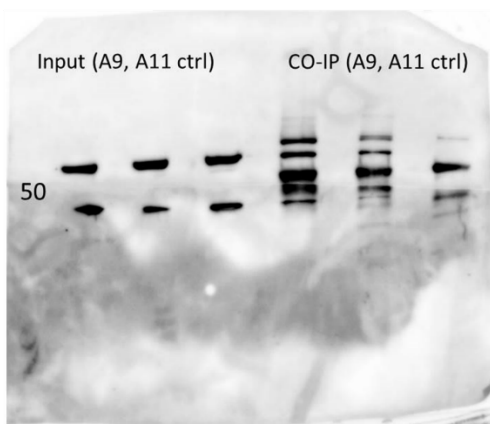

**Supplementary Figure S3. Hsp70 interacts with PKA-C $\alpha$  in A9 and A11 cells.** (a) Hsp70 expression is demonstrated in all cell lines. Following co-immunoprecipitation with PKA-C $\alpha$  antibody, Hsp70 is identified in the protein complexes from A9 and A11. (b) Full-length blot represented in panel A.
