# Supplementary material for: DNAJB1-PRKACA in HEK293T cells induces LINC00473 overexpression that depends on PKA signaling
Source: PubMed Central journal article supplement (PMC8846505; doi:10.1371/journal.pone.0263829), 2022-02-15
Supplement: pone.0263829.s004.pdf [file pone.0263829.s004.pdf]

Supplementary Figure S4.

(a)

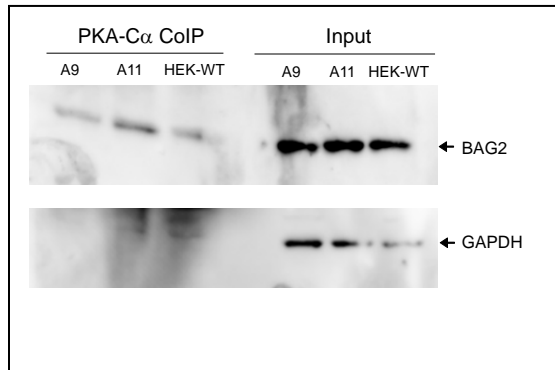

(b)

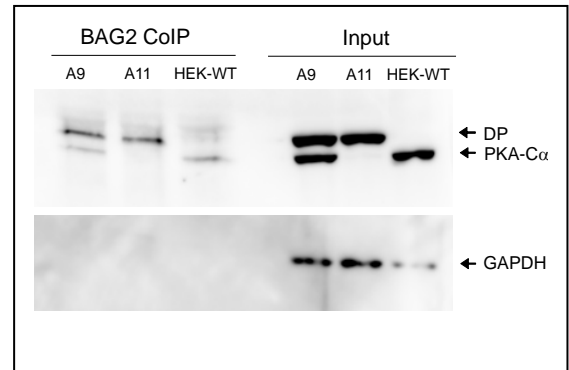

(c)

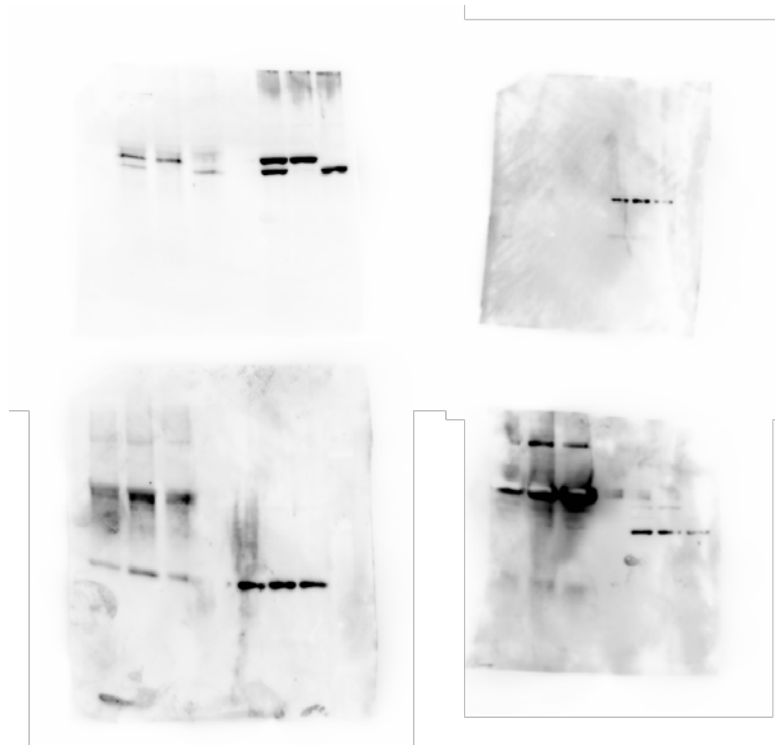

**Supplementary Figure S4. BAG2 interacts with DP and PKA-C $\alpha$ .** (a) Bag2 protein co-immunoprecipitates with DP and PKA-C $\alpha$  using PKA antibody. (b) DP and PKA immunoprecipitate using BAG2 antibody. (c) Full-length blots represented in a and b panels. GAPDH immunoreactivity is present in both input blots but not in the immunoprecipitated samples.
