# Supplementary material for: DNAJB1-PRKACA in HEK293T cells induces LINC00473 overexpression that depends on PKA signaling
Source: PubMed Central journal article supplement (PMC8846505; doi:10.1371/journal.pone.0263829), 2022-02-15
Supplement: pone.0263829.s005.pdf [file pone.0263829.s005.pdf]

Supplementary Table S1.

| <b>Gene</b> | <b>Protein</b>                                        | <b>A9 vs.<br/>HEK-WT<br/>Adj. p-<br/>value</b> | <b>A11 vs.<br/>HEK-WT<br/>Adj. p-value</b> |
|-------------|-------------------------------------------------------|------------------------------------------------|--------------------------------------------|
| DNAJB1      | DnaJ homolog subfamily B member 1                     | 3.09E-06                                       | 8.73E-07                                   |
| CTSH        | Pro-cathepsin H                                       | 3.09E-06                                       | 8.73E-07                                   |
| PRKACA      | cAMP-dependent protein kinase catalytic subunit alpha | 3.09E-06                                       | 8.73E-07                                   |
| RSRC2       | Arginine/serine-rich coiled-coil protein 2            | 3.09E-06                                       | 8.73E-07                                   |
| XRN2        | 5-3 exoribonuclease 2                                 | 3.09E-06                                       | 8.73E-07                                   |
| RPL9        | 60S ribosomal protein L9                              | 3.09E-06                                       | 8.73E-07                                   |
| GANAB       | Neutral alpha-glucosidase AB                          | 3.09E-06                                       | 8.87E-07                                   |
| ACSL3       | Long-chain-fatty-acid--CoA ligase 3                   | 3.26E-06                                       | 8.73E-07                                   |
| EMC7        | ER membrane protein complex subunit 7                 | 3.32E-06                                       | 8.73E-07                                   |
| MYO1C       | Unconventional myosin-Ic                              | 3.32E-06                                       | 8.73E-07                                   |
| CFL1        | Cofilin-1;Cofilin-2                                   | 3.32E-06                                       | 8.73E-07                                   |
| LIMA1       | LIM domain and actin-binding protein 1                | 3.32E-06                                       | 8.73E-07                                   |
| PFDN2       | Prefoldin subunit 2                                   | 3.32E-06                                       | 8.73E-07                                   |
| AAAS        | Aladin                                                | 3.32E-06                                       | 9.47E-07                                   |
| BAG2        | BAG family molecular chaperone regulator 2            | 3.4E-06                                        | 1.12E-06                                   |
| LUC7L3      | Luc7-like protein 3                                   | 3.5E-06                                        | 1.04E-06                                   |

|         |                                                                                                                    |          |          |
|---------|--------------------------------------------------------------------------------------------------------------------|----------|----------|
| LRPPRC  | Leucine-rich PPR motif-containing protein, mitochondrial                                                           | 3.65E-06 | 1.45E-06 |
| COPA    | Coatomer subunit alpha;Xenin;Proxenin                                                                              | 3.65E-06 | 1.13E-06 |
| DSG2    | Desmoglein-2                                                                                                       | 3.65E-06 | 8.73E-07 |
| DBN1    | Drebrin                                                                                                            | 3.65E-06 | 1.03E-06 |
| RPL12   | 60S ribosomal protein L12                                                                                          | 3.97E-06 | 1.94E-06 |
| H3F3B   | Histone H3;Histone H3.2;Histone H3.1t;Histone H3.3;Histone H3.1;Histone H3.3C                                      | 3.97E-06 | 1.45E-06 |
| LETM1   | LETM1 and EF-hand domain-containing protein 1, mitochondrial                                                       | 4.02E-06 | 1.51E-06 |
| MYH10   | Myosin-10                                                                                                          | 4.86E-06 | 1.34E-06 |
| GNB2    | Guanine nucleotide-binding protein G(I)/G(S)/G(T) subunit beta-2;Guanine nucleotide-binding protein subunit beta-4 | 5.1E-06  | 2.12E-06 |
| DNAJB11 | DnaJ homolog subfamily B member 11                                                                                 | 5.41E-06 | 1.94E-06 |
| ATP5O   | ATP synthase subunit O, mitochondrial                                                                              | 7.39E-06 | 2.64E-06 |
| PHGDH   | D-3-phosphoglycerate dehydrogenase                                                                                 | 8.22E-06 | 2.72E-06 |
| TBL2    | Transducin beta-like protein 2                                                                                     | 2.35E-05 | 8.02E-06 |
| WDR6    | WD repeat-containing protein 6                                                                                     | 2.89E-05 | 1.08E-05 |

**Supplementary Table S1. List of potential proteins which interact with DP fusion protein based on proteomic analysis.**
