# Supplementary material for: DNAJB1-PRKACA in HEK293T cells induces LINC00473 overexpression that depends on PKA signaling
Source: PubMed Central journal article supplement (PMC8846505; doi:10.1371/journal.pone.0263829), 2022-02-15
Supplement: pone.0263829.s006.pdf [file pone.0263829.s006.pdf]

Supplementary Table S2.

| Pathway Term                                          | Description                                           | p-value    | FDR   |
|-------------------------------------------------------|-------------------------------------------------------|------------|-------|
| Metabolism of proteins Homo sapiens R-HSA-392499      | Metabolism of proteins Homo sapiens R-HSA-392499      | 3.012E-06  | 0.005 |
| double-stranded RNA binding (GO:0003725)              | double-stranded RNA binding (GO:0003725)              | 6.8601E-05 | 0.007 |
| tRNA binding (GO:0000049)                             | tRNA binding (GO:0000049)                             | 6.6877E-05 | 0.007 |
| mRNA binding (GO:0003729)                             | mRNA binding (GO:0003729)                             | 7.1708E-05 | 0.007 |
| translation factor activity, RNA binding (GO:0008135) | translation factor activity, RNA binding (GO:0008135) | 6.3133E-05 | 0.007 |
| single-stranded RNA binding (GO:0003727)              | single-stranded RNA binding (GO:0003727)              | 6.5609E-05 | 0.007 |
| snoRNA binding (GO:0030515)                           | snoRNA binding (GO:0030515)                           | 6.1527E-05 | 0.008 |
| rRNA binding (GO:0019843)                             | rRNA binding (GO:0019843)                             | 6.1131E-05 | 0.008 |
| telomerase RNA binding (GO:0070034)                   | telomerase RNA binding (GO:0070034)                   | 6.1131E-05 | 0.008 |
| primary miRNA binding (GO:0070878)                    | primary miRNA binding (GO:0070878)                    | 6.0737E-05 | 0.008 |
| siRNA binding (GO:0035197)                            | siRNA binding (GO:0035197)                            | 6.0345E-05 | 0.009 |
| AU-rich element binding (GO:0017091)                  | AU-rich element binding (GO:0017091)                  | 6.0345E-05 | 0.009 |
| miRNA binding (GO:0035198)                            | miRNA binding (GO:0035198)                            | 6.0345E-05 | 0.009 |
| piRNA binding (GO:0034584)                            | piRNA binding (GO:0034584)                            | 5.9956E-05 | 0.01  |
| snRNA binding (GO:0017069)                            | snRNA binding (GO:0017069)                            | 5.9956E-05 | 0.01  |
| G-quadruplex RNA binding (GO:0002151)                 | G-quadruplex RNA binding (GO:0002151)                 | 5.9568E-05 | 0.01  |
| pre-miRNA binding (GO:0070883)                        | pre-miRNA binding (GO:0070883)                        | 5.9568E-05 | 0.01  |
| RNA cap binding (GO:0000339)                          | RNA cap binding (GO:0000339)                          | 5.9568E-05 | 0.015 |
| RNA stem-loop binding (GO:0035613)                    | RNA stem-loop binding (GO:0035613)                    | 5.9183E-05 | 0.01  |
| pre-mRNA binding (GO:0036002)                         | pre-mRNA binding (GO:0036002)                         | 5.9183E-05 | 0.01  |
| histone pre-mRNA DCP binding (GO:0071208)             | histone pre-mRNA DCP binding (GO:0071208)             | 5.9183E-05 | 0.01  |
| BRE binding (GO:0042835)                              | BRE binding (GO:0042835)                              | 5.9183E-05 | 0.02  |
| telomeric repeat-containing RNA binding (GO:0061752)  | telomeric repeat-containing RNA binding (GO:0061752)  | 5.9183E-05 | 0.02  |

|                                                        |                                                        |            |      |
|--------------------------------------------------------|--------------------------------------------------------|------------|------|
| 7S RNA binding (GO:0008312)                            | 7S RNA binding (GO:0008312)                            | 5.9183E-05 | 0.02 |
| 21U-RNA binding (GO:0034583)                           | 21U-RNA binding (GO:0034583)                           | 5.88E-05   | 0.02 |
| misfolded RNA binding (GO:0034336)                     | misfolded RNA binding (GO:0034336)                     | 5.88E-05   | 0.02 |
| base pairing with RNA (GO:0000498)                     | base pairing with RNA (GO:0000498)                     | 5.88E-05   | 0.03 |
| actin filament binding (GO:0051015)                    | actin filament binding (GO:0051015)                    | 0.00028692 | 0.03 |
| ribonuclease P RNA binding (GO:0033204)                | ribonuclease P RNA binding (GO:0033204)                | 5.88E-05   | 0.03 |
| N6-methyladenosine-containing RNA binding (GO:1990247) | N6-methyladenosine-containing RNA binding (GO:1990247) | 5.88E-05   | 0.04 |
| alpha-aminoacyl-tRNA binding (GO:1904678)              | alpha-aminoacyl-tRNA binding (GO:1904678)              | 5.88E-05   | 0.05 |
| actin lateral binding (GO:0003786)                     | actin lateral binding (GO:0003786)                     | 0.00063334 | 0.06 |
| RNA binding (GO:0003723)                               | RNA binding (GO:0003723)                               | 5.88E-05   | 0.06 |

**Supplementary Table S2. Gene enrichment pathway analysis based on proteomic data.**  
Ranked pathways of significance based on differential protein precipitation in response to PKA- $\alpha$  immunoprecipitation in A9 and A11 compared to HEK-WT.
